# Supplementary material for: Time of flight secondary ion mass spectrometry imaging of contaminant species in chemical vapour deposited graphene on copper
Source: publisher site journal article supplement (doi:10.3762/bjnano.17.13), 2026-01-21
Supplement: Additional file 1 [file 2190-4286-17-13-S1.pdf]

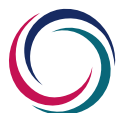

## Supporting Information

for

### **Time of flight secondary ion mass spectrometry imaging of contaminant species in chemical vapour deposited graphene on copper**

Barry Brennan, Vlad-Petru Veigang-Radulescu, Philipp Braeuninger-Weimer, Stephan Hofmann and Andrew J. Pollard

*Beilstein J. Nanotechnol.* **2026**, *17*, 200–213. doi:10.3762/bjnano.17.13

## Additional figures

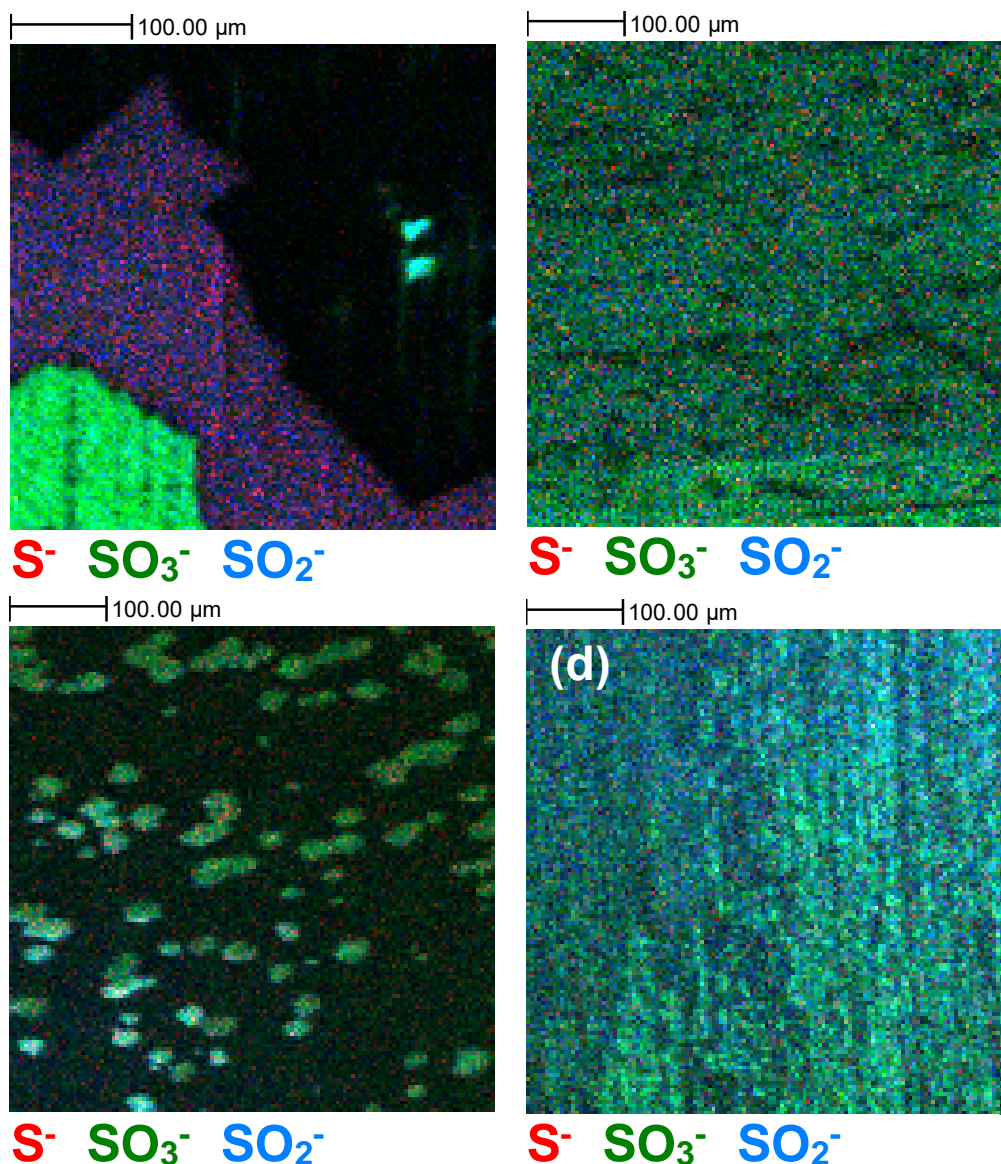

**Figure S1:** ToF-SIMS images (500  $\mu m \times 500 \mu m$ ) of the  $S^-$  (red),  $SO_3^-$  (green) and  $SO_2^-$  (blue) ion signals after graphene growth on copper with different growth mechanisms, from (a) backside oxidation + Ar annealed (BO), (b) Ar:H<sub>2</sub> annealed (Ar:H<sub>2</sub>), (c) electro-polished + Ar:H<sub>2</sub> anneal (EP), and (d) Ar annealed (Ar) samples, for the same areas of the samples as in Figure 1 and 2.

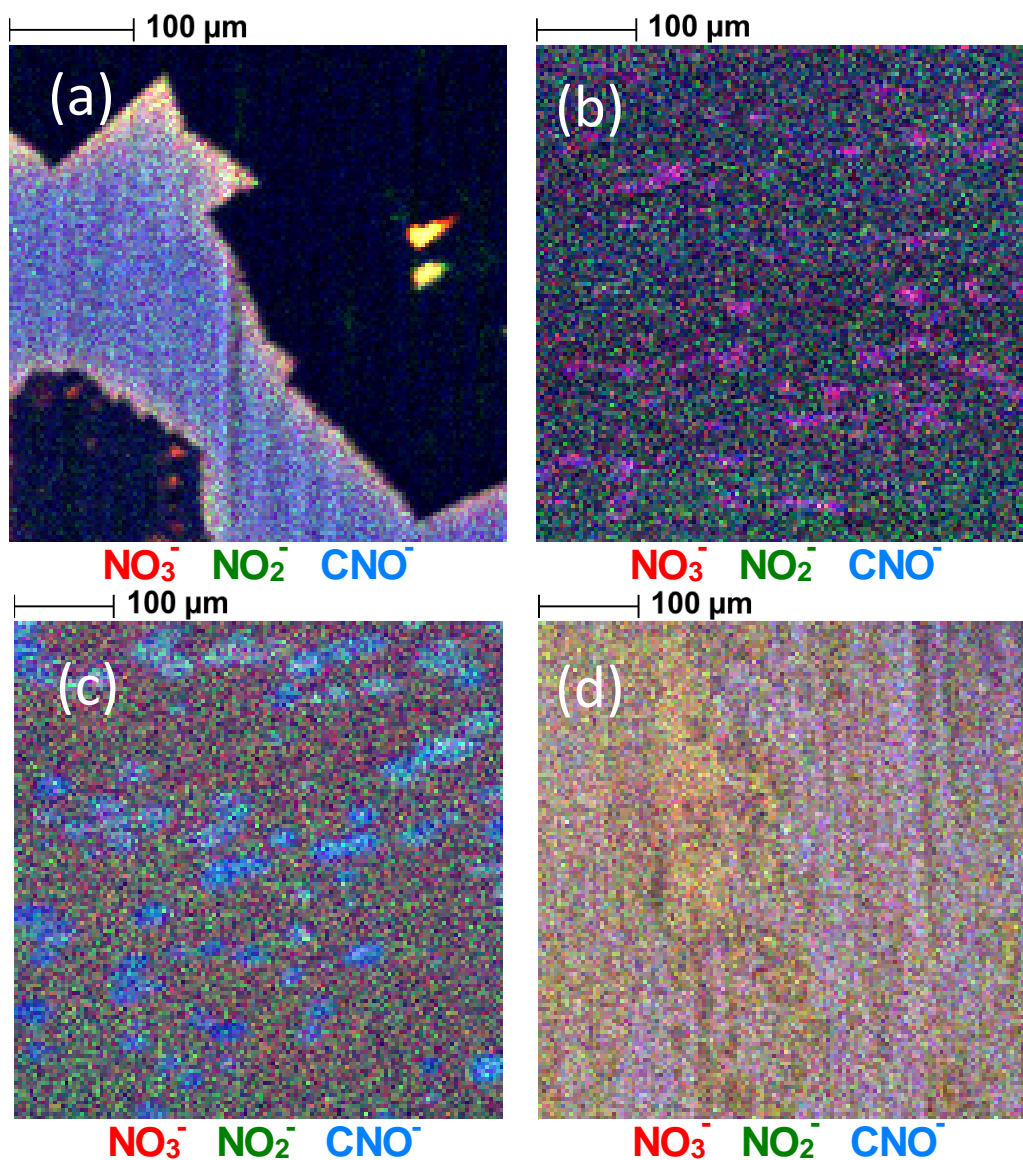

**Figure S2:** ToF-SIMS images (500  $\mu\text{m} \times 500 \mu\text{m}$ ) of the  $\text{NO}_3^-$  (red),  $\text{NO}_2^-$  (green) and  $\text{CNO}^-$  (blue) ion signals after graphene growth on copper with different growth mechanisms, from (a) backside oxidation + Ar annealed (BO), (b) Ar:H<sub>2</sub> annealed (Ar:H<sub>2</sub>), (c) electro-polished + Ar:H<sub>2</sub> anneal (EP), and (d) Ar annealed (Ar) samples, for the same areas of the samples as in Figure 1 and 2.

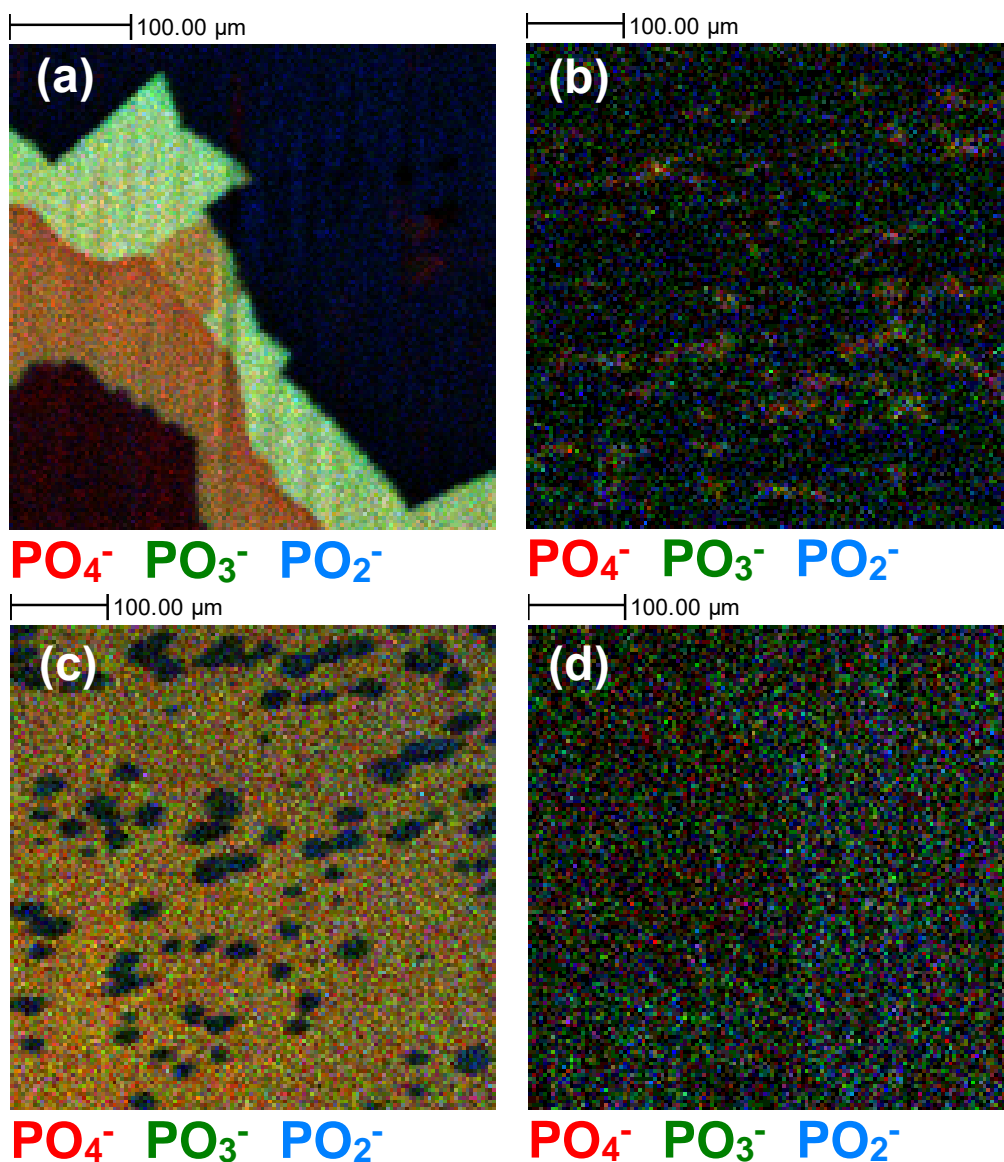

**Figure S3:** ToF-SIMS images (500  $\mu\text{m} \times 500 \mu\text{m}$ ) of the  $\text{PO}_4^-$  (red),  $\text{PO}_3^-$  (green) and  $\text{PO}_2^-$  (blue) ion signals after graphene growth on copper with different growth mechanisms, from (a) backside oxidation + Ar annealed (BO), (b) Ar: $\text{H}_2$  annealed (Ar: $\text{H}_2$ ), (c) electro-polished + Ar: $\text{H}_2$  anneal (EP), and (d) Ar annealed (Ar) samples, for the same areas of the samples as in Figure 1 and 2.
